# Supplementary material for: Fractional and integer stages of lithium ion–graphite systems: the role of electrostatic and elastic contributions
Source: Royal Society of Chemistry journal article supplement (doi:10.1039/d0cp01886d), 2020-01-01
Supplement: d0cp01886d1.pdf [file d0cp01886d1.pdf]

## Fractional and integer stages of lithium ion-graphite systems. The role of electrostatic and elastic contributions.

E.M. Gavilán-Arriazu, J. M. Hümöller, O.A. Pinto, B.A. López de Mishima, E.P.M Leiva and O.A. Oviedo

### Supplementary Information

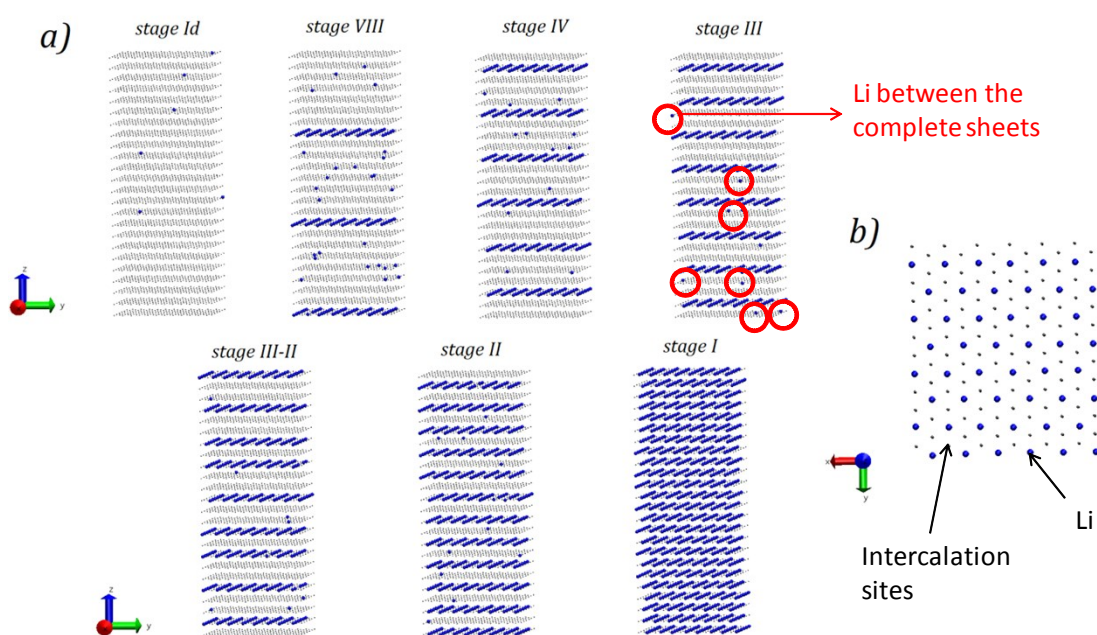

**Figure S1:** a) Snapshots from Grand Canonical Monte Carlo simulations, showing the different structures obtained. The gray spheres correspond to empty intercalation sites and the blue ones to Li atoms. For simplicity C atoms are not shown. Note the presence of inserted Li-ions between filled Li-ion layers. These kind of inserted ions are practically absent in simulations that do not consider elastic effects. b) Snapshot of a top view of the simulation box, showing the  $\sqrt{3} \times \sqrt{3}$  Li structure in a given plane.
